# Supplementary material
Source: PubMed Central journal article supplement (PMC7796951)
Supplement: NIHMS1622356-supplement-1.pdf [file NIHMS1622356-supplement-1.pdf]

## **SUPPLEMENT**

### **Association of Infant Antibiotic Exposure With Childhood Health Outcomes**

Zaira Aversa, M.D., Ph.D.<sup>1,2</sup>, Elizabeth J. Atkinson, M.S.<sup>3</sup>, Marissa J. Schafer, Ph.D.<sup>1,2</sup>,  
Regan N. Theiler, M.D., Ph.D.<sup>4</sup>, Walter A. Rocca, M.D.<sup>5,6</sup>, Martin J. Blaser, M.D.<sup>7</sup>,  
Nathan K. LeBrasseur, Ph.D.<sup>1,2</sup>

#### **TABLE OF CONTENTS**

##### **Supplemental Figures and Tables**

**Supplemental Figure 1:** Study Design and Participant Inclusion and Exclusion Flow Chart

**Supplemental Figure 2:** Kaplan-Meier Curves of Time to Event for Health Conditions with Childhood Onset stratified by Sex and Antibiotic Exposure in the First 24 Months of Life

**Supplemental Figure 3:** Heat Map of the Frequency of Health Condition Dyads among Children Unexposed to Antibiotics and among Children Exposed to Antibiotics

**Supplemental Table 1:** Diagnostic Codes of Specified Health Conditions with Childhood Onset

**Supplemental Table 2:** Description of the Antibiotic Prescriptions Examined in this Study

**Supplemental Table 3:** Number of Children Without (no) and With (yes) Diagnosis of Specified Health Conditions at 2 Years of Age

**Supplemental Table 4:** The Prevalence of Common Diagnoses in Children during the First 2 Years of Life Stratified by the Number of Antibiotic Courses Prescribed

**Supplemental Table 5:** Association between Timing of Antibiotic Prescriptions and Risk of Several Common Health Conditions with Childhood Onset

**Supplemental Table 6:** Associations between Child and Maternal Factors and Several Common Health Conditions with Childhood Onset

**Supplemental Table 7:** Associations between Antibiotic Prescriptions in the First Two Years of Life and Risk of Common Health Conditions with Childhood Onset after Adjustment for Child Confounders (birth weight, ethnicity, and cesarean section) and Maternal Confounders (age, education, smoking, and antibiotic use during pregnancy), in Females and Males Separately.

**Supplemental Table 8:** The Number (No.) and Percentage (%) of Children with the most Common Disease Dyads and Triads Stratified by Exposure to Antibiotics in the First 24 Months of Life

**Supplemental Figure 1.** Study Design and Participant Inclusion and Exclusion Flow Chart.

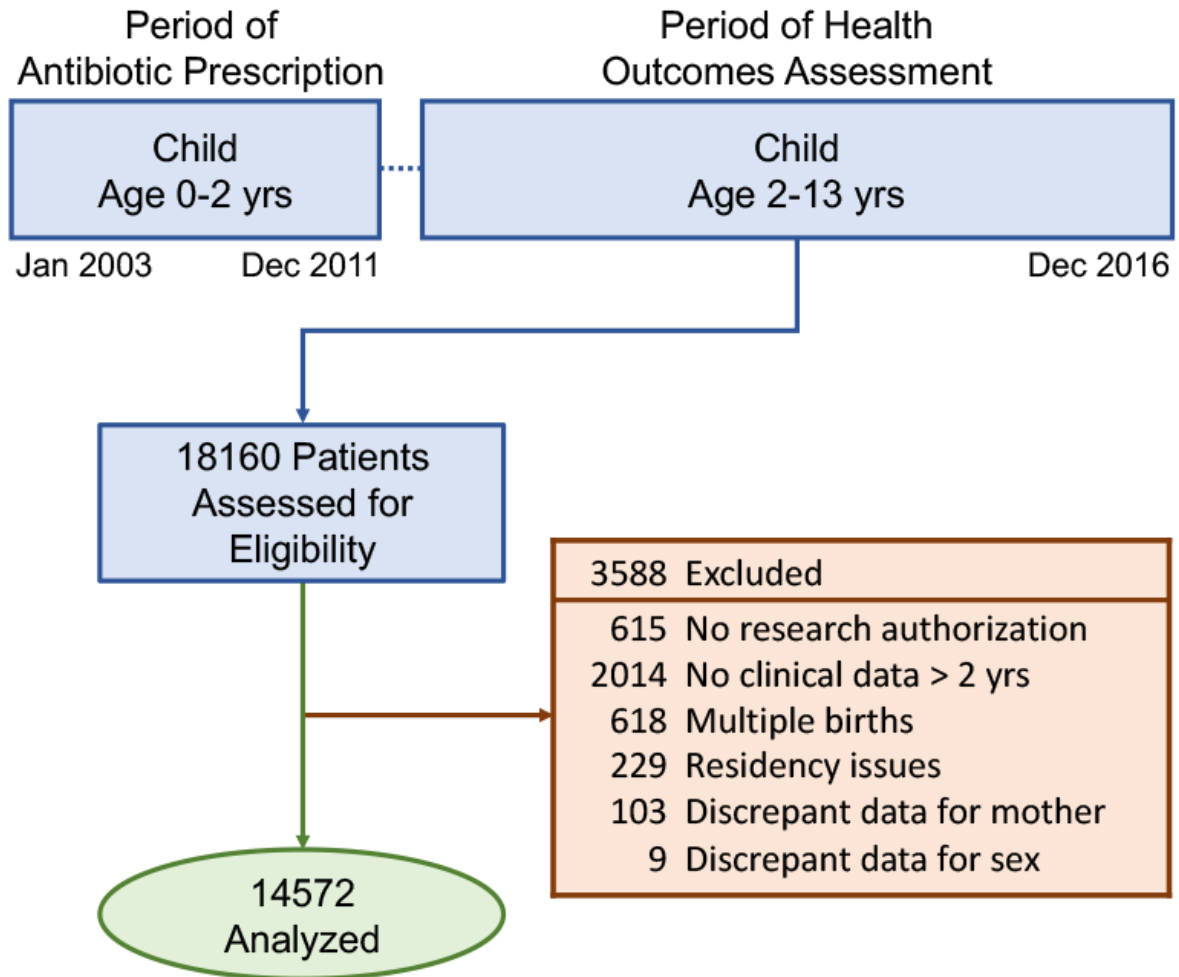

**Supplemental Figure 2: Kaplan-Meier Curves of Time to Event for Health Conditions with Childhood Onset Stratified by Sex and Antibiotic Exposure in the First 24 Months of Life.** The numbers (No.) of females unexposed (F-No), females exposed (F-Yes), males unexposed (M-No), and males exposed (M-Yes) to antibiotics and at risk for (A) food allergy, (B) atopic dermatitis, (C) celiac disease, (D) obesity, (E) autism, and (F) learning disability are reported below the x-axis for the specified ages. The total numbers of events for each group are reported in the legend for each condition.

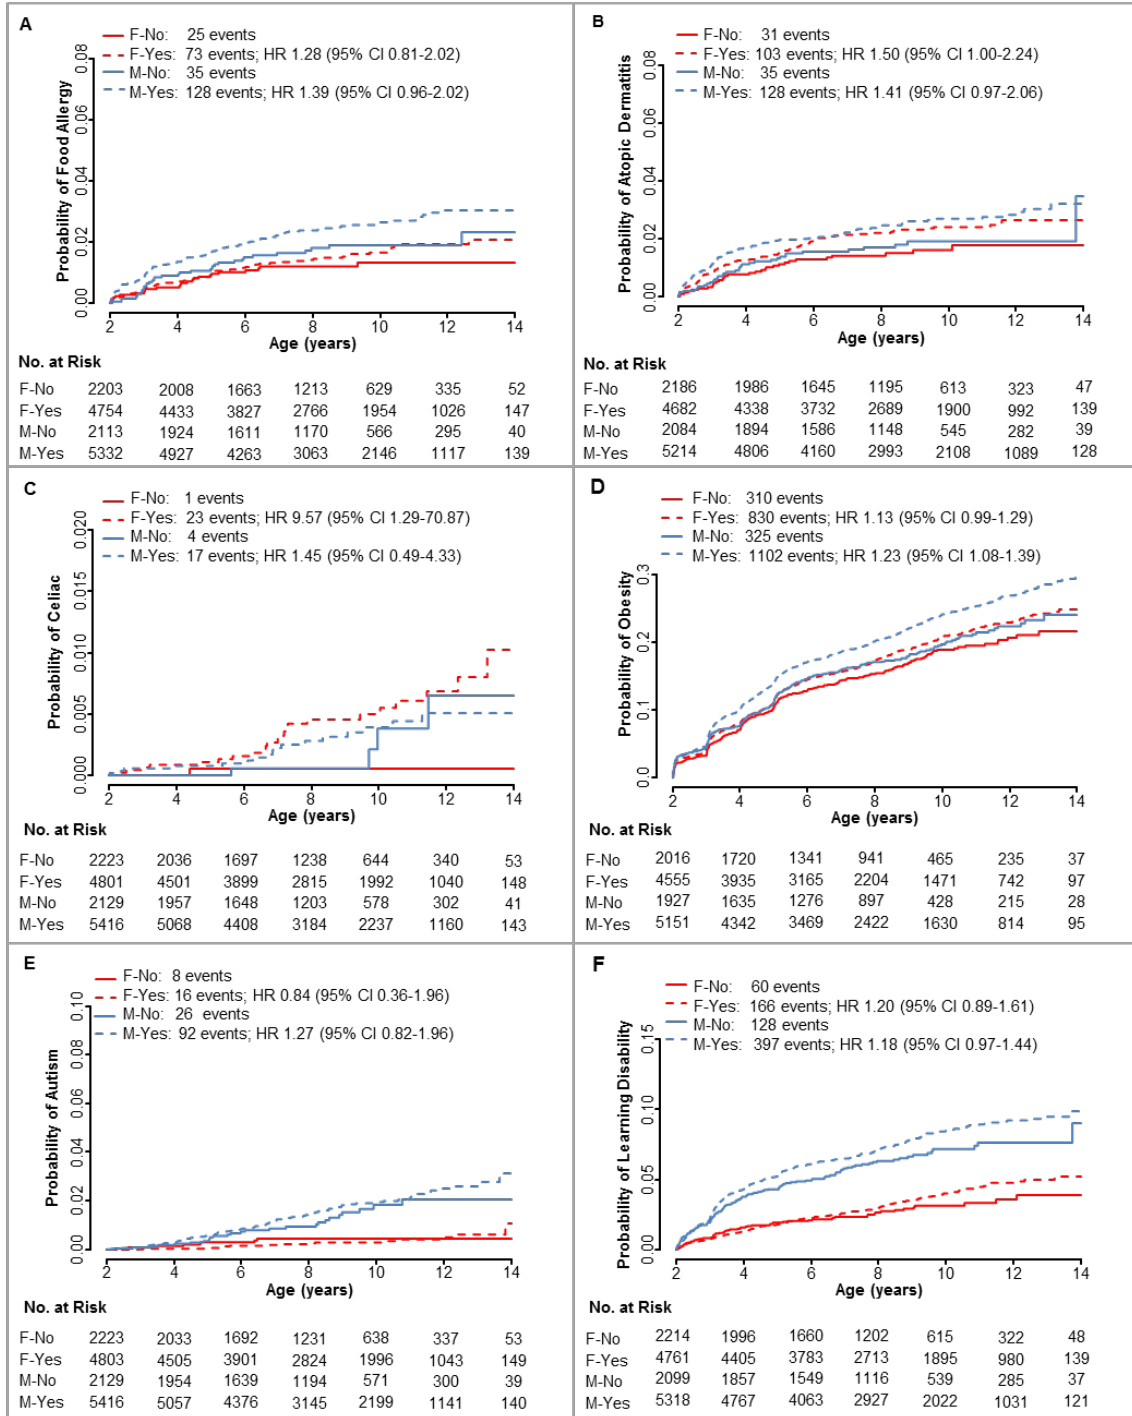

**Supplemental Figure 3. Heat Map of the Frequency of Health Condition Dyads among Children Unexposed to Antibiotics and among Children Exposed to Antibiotics.** Data expressed as the percentage of children unexposed to antibiotics with at least 2 conditions (upper left, n = 422) or the percentage of children exposed to antibiotics with at least two conditions (lower right, n = 1,595).

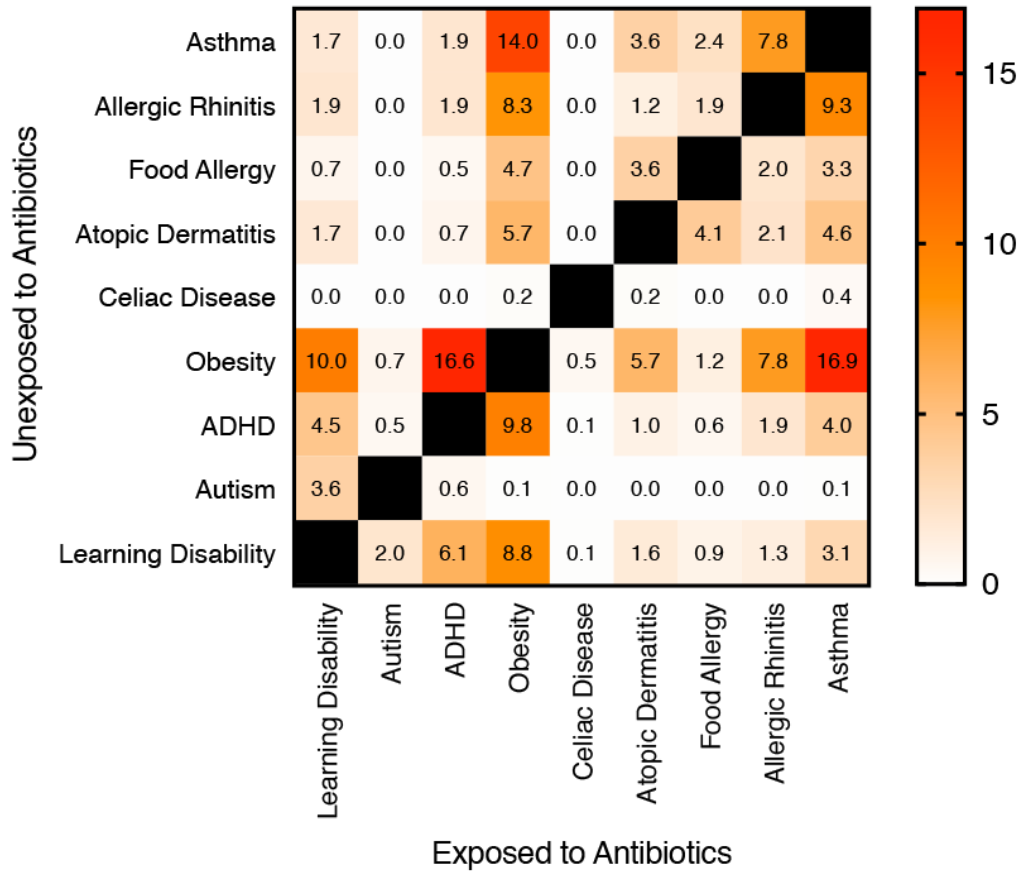

**Supplemental Table 1.** Diagnostic Codes of Specified Health Conditions with Childhood Onset.

| <b>Outcome</b>           | <b>Code type</b> | <b>Code</b>                                       | <b>Description</b>                                              |
|--------------------------|------------------|---------------------------------------------------|-----------------------------------------------------------------|
| <b>Asthma</b>            | ICD-10           | J44.1                                             | Chronic obstructive pulmonary disease with (acute) exacerbation |
|                          | ICD-10           | J44.9                                             | Chronic obstructive pulmonary disease, unspecified              |
|                          | ICD-10           | J45.20                                            | Mild intermittent asthma, uncomplicated                         |
|                          | ICD-10           | J45.21                                            | Mild intermittent asthma with (acute) exacerbation              |
|                          | ICD-10           | J45.22                                            | Mild intermittent asthma with status asthmaticus                |
|                          | ICD-10           | J45.30                                            | Mild persistent asthma, uncomplicated                           |
|                          | ICD-10           | J45.31                                            | Mild persistent asthma with (acute) exacerbation                |
|                          | ICD-10           | J45.32                                            | Mild persistent asthma with status asthmaticus                  |
|                          | ICD-10           | J45.40                                            | Moderate persistent asthma, uncomplicated                       |
|                          | ICD-10           | J45.41                                            | Moderate persistent asthma with (acute) exacerbation            |
|                          | ICD-10           | J45.42                                            | Moderate persistent asthma with status asthmaticus              |
|                          | ICD-10           | J45.50                                            | Severe persistent asthma, uncomplicated                         |
|                          | ICD-10           | J45.51                                            | Severe persistent asthma with (acute) exacerbation              |
|                          | ICD-10           | J45.52                                            | Severe persistent asthma with status asthmaticus                |
|                          | ICD-10           | J45.901                                           | Unspecified asthma with (acute) exacerbation                    |
|                          | ICD-10           | J45.902                                           | Unspecified asthma with status asthmaticus                      |
|                          | ICD-10           | J45.909                                           | Unspecified asthma, uncomplicated                               |
|                          | ICD-10           | J45.990                                           | Exercise induced bronchospasm                                   |
|                          | ICD-10           | J45.991                                           | Cough variant asthma                                            |
|                          | ICD-10           | J45.998                                           | Other asthma                                                    |
|                          | ICD-10           | Z87.09                                            | Personal history of other diseases of the respiratory system    |
|                          | ICD-9            | 493                                               | Extrinsic asthma, unspecified                                   |
|                          | ICD-9            | 493.01                                            | Extrinsic asthma with status asthmaticus                        |
|                          | ICD-9            | 493.02                                            | Extrinsic asthma with acute exacerbation                        |
|                          | ICD-9            | 493.1                                             | Intrinsic asthma, unspecified                                   |
|                          | ICD-9            | 493.11                                            | Intrinsic asthma with status asthmaticus                        |
|                          | ICD-9            | 493.12                                            | Intrinsic asthma with acute exacerbation                        |
|                          | ICD-9            | 493.2                                             | Chronic obstructive asthma, unspecified                         |
|                          | ICD-9            | 493.21                                            | Chronic obstructive asthma, with status asthmaticus             |
|                          | ICD-9            | 493.22                                            | Chronic obstructive asthma, with acute exacerbation             |
|                          | ICD-9            | 493.81                                            | Exercise induced bronchospasm                                   |
|                          | ICD-9            | 493.82                                            | Cough variant asthma                                            |
|                          | ICD-9            | 493.9                                             | Asthma, unspecified                                             |
| ICD-9                    | 493.91           | Asthma, unspecified type, with status asthmaticus |                                                                 |
| ICD-9                    | 493.92           | Asthma, unspecified, with acute exacerbation      |                                                                 |
| <b>Allergic rhinitis</b> | ICD-10           | J30.1                                             | Allergic rhinitis due to pollen                                 |
|                          | ICD-10           | J30.2                                             | Other seasonal allergic rhinitis                                |
|                          | ICD-10           | J30.5                                             | Allergic rhinitis due to food                                   |
|                          | ICD-10           | J30.81                                            | Allergic rhinitis due to animal (cat) (dog) hair and dander     |
|                          | ICD-10           | J30.89                                            | Other allergic rhinitis                                         |
|                          | ICD-10           | J30.9                                             | Allergic rhinitis, unspecified                                  |
|                          | ICD-9            | 477                                               | Allergic rhinitis due to pollen                                 |
|                          | ICD-9            | 477.1                                             | Allergic rhinitis, due to food                                  |
|                          | ICD-9            | 477.2                                             | Allergic rhinitis, due to animal (cat) (dog) hair and dander    |
|                          | ICD-9            | 477.8                                             | Allergic rhinitis due to other allergen                         |
|                          | ICD-9            | 477.9                                             | Allergic rhinitis nos                                           |
|                          | ICD-9            | 477.9                                             | Allergic rhinitis, cause unspecified                            |

| <b>Outcome</b>        | <b>Code type</b>         | <b>Code</b> | <b>Description</b>                                                           |
|-----------------------|--------------------------|-------------|------------------------------------------------------------------------------|
| <b>Food allergy</b>   | ICD-10                   | T78.00XA    | Anaphylactic reaction due to unspecified food, initial encounter             |
|                       | ICD-10                   | T78.01XA    | Anaphylactic reaction due to peanuts, initial encounter                      |
|                       | ICD-10                   | T78.05XA    | Anaphylactic reaction due to tree nuts and seeds, initial encounter          |
|                       | ICD-10                   | T78.06XA    | Anaphylactic reaction due to food additives, initial encounter               |
|                       | ICD-10                   | T78.07XA    | Anaphylactic reaction due to milk and dairy products, initial encounter      |
|                       | ICD-10                   | T78.08XA    | Anaphylactic reaction due to eggs, initial encounter                         |
|                       | ICD-10                   | T78.09XA    | Anaphylactic reaction due to other food products, initial encounter          |
|                       | ICD-10                   | T78.1XXA    | Other adverse food reactions, not elsewhere classified, initial encounter    |
|                       | ICD-10                   | T78.1XXD    | Other adverse food reactions, not elsewhere classified, subsequent encounter |
|                       | ICD-10                   | Z91.010     | Allergy to peanuts                                                           |
|                       | ICD-10                   | Z91.011     | Allergy to milk products                                                     |
|                       | ICD-10                   | Z91.012     | Allergy to eggs                                                              |
|                       | ICD-10                   | Z91.013     | Allergy to seafood                                                           |
|                       | ICD-10                   | Z91.018     | Allergy to other foods                                                       |
|                       | ICD-9                    | 477.1       | allergic rhinitis, due to food                                               |
|                       | ICD-9                    | 692.5       | Contact dermatitis and other eczema due to food in contact with skin         |
|                       | ICD-9                    | 693.1       | Dermatitis due to food taken internally                                      |
|                       | ICD-9                    | 995.6       | Anaphylactic shock due to unspecified food                                   |
|                       | ICD-9                    | 995.61      | Anaphylactic shock due to peanuts                                            |
|                       | ICD-9                    | 995.63      | Anaphylactic shock due to fruits and vegetables                              |
|                       | ICD-9                    | 995.64      | Anaphylactic shock due to tree nuts and seeds                                |
|                       | ICD-9                    | 995.65      | Anaphylactic shock due to fish                                               |
|                       | ICD-9                    | 995.67      | Anaphylactic shock due to milk products                                      |
|                       | ICD-9                    | 995.68      | Anaphylactic shock due to eggs                                               |
|                       | ICD-9                    | 995.69      | Anaphylactic shock due to other specified food                               |
|                       | ICD-9                    | 995.7       | Other adverse food reactions, not elsewhere classified                       |
|                       | ICD-9                    | V15.01      | Allergy to peanuts                                                           |
|                       | ICD-9                    | V15.02      | Allergy to dairy prods.                                                      |
|                       | ICD-9                    | V15.03      | Allergy to eggs                                                              |
|                       | ICD-9                    | V15.04      | Allergy to seafood                                                           |
|                       | ICD-9                    | V15.05      | Allergy to other food                                                        |
|                       | <b>Atopic dermatitis</b> | ICD-10      | L20.82                                                                       |
| ICD-10                |                          | L20.84      | Intrinsic (allergic) eczema                                                  |
| ICD-10                |                          | L20.89      | Other atopic dermatitis                                                      |
| ICD-9                 |                          | 691.8       | Other atopic dermatitis and related conditions                               |
| <b>Celiac disease</b> | ICD-10                   | K90.0       | Celiac disease                                                               |
|                       | ICD-9                    | 579         | Celiac disease                                                               |
| <b>ADHD</b>           | ICD-10                   | F90.0       | Attention-deficit hyperactivity disorder, predominantly inattentive type     |
|                       | ICD-10                   | F90.1       | Attention-deficit hyperactivity disorder, predominantly hyperactive type     |
|                       | ICD-10                   | F90.2       | Attention-deficit hyperactivity disorder, combined type                      |
|                       | ICD-10                   | F90.8       | Attention-deficit hyperactivity disorder, other type                         |
|                       | ICD-10                   | F90.9       | Attention-deficit hyperactivity disorder, unspecified type                   |
|                       | ICD-9                    | 314         | Attention deficit disorder of childhood without mention of hyperactivity     |
|                       | ICD-9                    | 314.01      | Attention deficit disorder of childhood with hyperactivity                   |
|                       | ICD-9                    | 314.1       | Hyperkinesis of childhood with developmental delay                           |
|                       | ICD-9                    | 314.9       | Unspecified hyperkinetic syndrome of childhood                               |

| <b>Outcome</b>             | <b>Code type</b> | <b>Code</b> | <b>Description</b>                                                 |
|----------------------------|------------------|-------------|--------------------------------------------------------------------|
| <b>Autism</b>              | ICD-10           | F84.0       | Autistic disorder                                                  |
|                            | ICD-10           | F84.5       | Asperger's syndrome                                                |
|                            | ICD-10           | F84.8       | Other pervasive developmental disorders                            |
|                            | ICD-10           | F84.9       | Pervasive developmental disorder, unspecified                      |
|                            | ICD-9            | 299         | Infantile autism, current or active state                          |
|                            | ICD-9            | 299.01      | Infantile autism, residual state                                   |
|                            | ICD-9            | 299.1       | Disintegrative psychosis, current or active state                  |
|                            | ICD-9            | 299.8       | Other specified early childhood psychoses, current or active state |
|                            | ICD-9            | 299.9       | Unspecified childhood psychosis, current or active state           |
| <b>Learning disability</b> | ICD-10           | F48.9       | Nonpsychotic mental disorder, unspecified                          |
|                            | ICD-10           | F80.0       | Phonological disorder                                              |
|                            | ICD-10           | F80.1       | Expressive language disorder                                       |
|                            | ICD-10           | F80.2       | Mixed receptive-expressive language disorder                       |
|                            | ICD-10           | F80.4       | Speech and language development delay due to hearing loss          |
|                            | ICD-10           | F80.81      | Childhood onset fluency disorder                                   |
|                            | ICD-10           | F80.82      | Social pragmatic communication disorder                            |
|                            | ICD-10           | F80.89      | Other developmental disorders of speech and language               |
|                            | ICD-10           | F80.9       | Developmental disorder of speech and language, unspecified         |
|                            | ICD-10           | F81.0       | Specific reading disorder                                          |
|                            | ICD-10           | F81.2       | Mathematics disorder                                               |
|                            | ICD-10           | F81.81      | Disorder of written expression                                     |
|                            | ICD-10           | F81.89      | Other developmental disorders of scholastic skills                 |
|                            | ICD-10           | F81.9       | Developmental disorder of scholastic skills, unspecified           |
|                            | ICD-10           | F82         | Specific developmental disorder of motor function                  |
|                            | ICD-10           | F88         | Other disorders of psychological development                       |
|                            | ICD-9            | 315         | Developmental reading disorder, unspecified                        |
|                            | ICD-9            | 315.02      | Developmental dyslexia                                             |
|                            | ICD-9            | 315.09      | Other specific developmental reading disorder                      |
|                            | ICD-9            | 315.1       | Developmental arithmetical disorder                                |
|                            | ICD-9            | 315.2       | Other specific developmental learning difficulties                 |
|                            | ICD-9            | 315.31      | Developmental language disorder                                    |
|                            | ICD-9            | 315.32      | Receptive language disorder (mixed)                                |
|                            | ICD-9            | 315.34      | Speech and language developmental delay due to hearing loss        |
|                            | ICD-9            | 315.35      | Childhood onset fluency disorder                                   |
|                            | ICD-9            | 315.39      | Other developmental speech disorder                                |
|                            | ICD-9            | 315.4       | Developmental coordination disorder                                |
|                            | ICD-9            | 315.5       | Mixed development disorder                                         |
|                            | ICD-9            | 315.8       | Other specified delays in development                              |
|                            | ICD-9            | 315.9       | Unspecified delay in development                                   |

**Supplemental Table 2.** Description of the Antibiotic Prescriptions Examined in this Study.

| <b>Antibiotic classes</b><br>(NDF-RT classification) | <b>Antibacterial agents</b><br>(RxNorm description)                                                                                                                                    |
|------------------------------------------------------|----------------------------------------------------------------------------------------------------------------------------------------------------------------------------------------|
| Penicillins                                          | Amoxicillin<br>Amoxicillin / Clavulanate<br>Ampicillin<br>Clavulanate<br>Dicloxacillin<br>Oxacillin<br>Penicillin G<br>Penicillin G benzathine / Penicillin G procaine<br>Penicillin V |
| Cephalosporins                                       | Cefaclor<br>Cefadroxil<br>Cefazolin<br>Cefdinir<br>Cefepime<br>Cefixime<br>Cefpodoxime<br>Cefprozil<br>Ceftazidime<br>Ceftriaxone<br>Cefuroxime<br>Cephalexin                          |
| Sulfonamides                                         | Sulfamethoxazole / Trimethoprim<br>Sulfisoxazole<br>Trimethoprim                                                                                                                       |
| Macrolides                                           | Azithromycin<br>Clarithromycin<br>Erythromycin base                                                                                                                                    |
| Lincomycins <sup>a</sup>                             | Clindamycin                                                                                                                                                                            |
| Nitrofurans                                          | Nitrofurantoin                                                                                                                                                                         |
| Quinolones                                           | Ciprofloxacin ophthalmic preparation ( product )<br>Levofloxacin                                                                                                                       |
| Aminoglycosides                                      | Gentamicin sulfate ( usp )                                                                                                                                                             |
| Antituberculars                                      | Isoniazid<br>Rifampin                                                                                                                                                                  |
| Chloramphenicol                                      | Chloramphenicol                                                                                                                                                                        |
| Beta-lactams antimicrobials, other                   | Loracarbef                                                                                                                                                                             |
| Anti-invectives, other                               | Colistin<br>Erythromycin / sulfisoxazole<br>Linezolid<br>Metronidazole<br>Vancomycin                                                                                                   |

<sup>a</sup>Lincomycins were included in the macrolides class in the statistical analysis.



**Supplemental Table 3.** Number of Children Without (no) and With (yes) Diagnosis of Specified Health Conditions by 2 Years of Age.

| <b>Condition</b>               | <b>Females (n=7026)</b> | <b>Males (n=7546)</b> | <b>All (n=14572)</b> |
|--------------------------------|-------------------------|-----------------------|----------------------|
| <b>Asthma</b>                  |                         |                       |                      |
| No                             | 6940 (98.8%)            | 7359 (97.5%)          | 14299 (98.1%)        |
| Yes                            | 86 (1.2%)               | 187 (2.5%)            | 273 (1.9%)           |
| <b>Allergic rhinitis</b>       |                         |                       |                      |
| No                             | 7017 (99.9%)            | 7528 (99.8%)          | 14545 (99.8%)        |
| Yes                            | 9 (0.1%)                | 18 (0.2%)             | 27 (0.2%)            |
| <b>Food allergy</b>            |                         |                       |                      |
| No                             | 6957 (99.0%)            | 7445 (98.7%)          | 14402 (98.8%)        |
| Yes                            | 69 (1.0%)               | 101 (1.3%)            | 170 (1.2%)           |
| <b>Atopic dermatitis</b>       |                         |                       |                      |
| No                             | 6868 (97.8%)            | 7298 (96.7%)          | 14166 (97.2%)        |
| Yes                            | 158 (2.2%)              | 248 (3.3%)            | 406 (2.8%)           |
| <b>Celiac disease</b>          |                         |                       |                      |
| No                             | 7024 (100.0%)           | 7545 (100.0%)         | 14569 (100.0%)       |
| Yes                            | 2 (0.0%)                | 1 (0.0%)              | 3 (0.0%)             |
| <b>Overweight <sup>a</sup></b> |                         |                       |                      |
| No                             | 6208 (88.4%)            | 6665 (88.3%)          | 12873 (88.3%)        |
| Yes                            | 818 (11.6%)             | 881 (11.7%)           | 1699 (11.7%)         |
| <b>Obesity <sup>a</sup></b>    |                         |                       |                      |
| No                             | 6571 (93.5%)            | 7078 (93.8%)          | 13649 (93.7%)        |
| Yes                            | 455 (6.5%)              | 468 (6.2%)            | 923 (6.3%)           |
| <b>ADHD</b>                    |                         |                       |                      |
| No                             | 7026 (100.0%)           | 7546 (100.0%)         | 14572 (100.0%)       |
| Yes                            | 0 (0.0%)                | 0 (0.0%)              | 0 (0.0%)             |
| <b>Autism</b>                  |                         |                       |                      |
| No                             | 7026 (100.0%)           | 7545 (100.0%)         | 14571 (100.0%)       |
| Yes                            | 0 (0.0%)                | 1 (0.0%)              | 1 (0.0%)             |
| <b>Learning disability</b>     |                         |                       |                      |
| No                             | 6975 (99.3%)            | 7417 (98.3%)          | 14392 (98.8%)        |
| Yes                            | 51 (0.7%)               | 129 (1.7%)            | 180 (1.2%)           |

<sup>a</sup>The presence of overweight and obesity at age 2 years was determined by using the latest measurement prior to age 2 years.

**Supplemental Table 4.** The Prevalence of Common Diagnoses in Children during the First 2 Years of Life Stratified by the Number of Antibiotic Courses Prescribed.

| Diagnosis (Dx)                                                       |       | No. of Antibiotic Exposures |                 |                 |                | Total<br>(n=14572) |
|----------------------------------------------------------------------|-------|-----------------------------|-----------------|-----------------|----------------|--------------------|
|                                                                      |       | 0<br>(n=4352)               | 1-2<br>(n=4560) | 3-4<br>(n=2434) | 5+<br>(n=3226) |                    |
| Acute upper respiratory infections of multiple and unspecified sites | None  | 1931 (44.4%)                | 1264 (27.7%)    | 351 (14.4%)     | 242 (7.5%)     | 3788 (26.0%)       |
|                                                                      | ≥1 Dx | 2421 (55.6%)                | 3296 (72.3%)    | 2083 (85.6%)    | 2984 (92.5%)   | 10784 (74.0%)      |
| Suppurative and unspecified otitis media                             | None  | 3402 (78.2%)                | 1203 (26.4%)    | 187 (7.7%)      | 103 (3.2%)     | 4895 (33.6%)       |
|                                                                      | ≥1 Dx | 950 (21.8%)                 | 3357 (73.6%)    | 2247 (92.3%)    | 3123 (96.8%)   | 9677 (66.4%)       |
| Other ear and sense organ disorders                                  | None  | 1850 (42.5%)                | 1549 (34.0%)    | 751 (30.9%)     | 892 (27.7%)    | 5042 (34.6%)       |
|                                                                      | ≥1 Dx | 2502 (57.5%)                | 3011 (66.0%)    | 1683 (69.1%)    | 2334 (72.3%)   | 9530 (65.4%)       |
| Other and unspecified perinatal conditions                           | None  | 1835 (42.2%)                | 1823 (40.0%)    | 816 (33.5%)     | 780 (24.2%)    | 5254 (36.1%)       |
|                                                                      | ≥1 Dx | 2517 (57.8%)                | 2737 (60.0%)    | 1618 (66.5%)    | 2446 (75.8%)   | 9318 (63.9%)       |
| Other and unspecified lower respiratory disease                      | None  | 3055 (70.2%)                | 2595 (56.9%)    | 1064 (43.7%)    | 995 (30.8%)    | 7709 (52.9%)       |
|                                                                      | ≥1 Dx | 1297 (29.8%)                | 1965 (43.1%)    | 1370 (56.3%)    | 2231 (69.2%)   | 6863 (47.1%)       |
| Fever of unknown origin                                              | None  | 2981 (68.5%)                | 2587 (56.7%)    | 1100 (45.2%)    | 1067 (33.1%)   | 7735 (53.1%)       |
|                                                                      | ≥1 Dx | 1371 (31.5%)                | 1973 (43.3%)    | 1334 (54.8%)    | 2159 (66.9%)   | 6837 (46.9%)       |
| Allergic reactions                                                   | None  | 2825 (64.9%)                | 2658 (58.3%)    | 1235 (50.7%)    | 1424 (44.1%)   | 8142 (55.9%)       |
|                                                                      | ≥1 Dx | 1527 (35.1%)                | 1902 (41.7%)    | 1199 (49.3%)    | 1802 (55.9%)   | 6430 (44.1%)       |
| Other and unspecified viral infection                                | None  | 3349 (77.0%)                | 3133 (68.7%)    | 1443 (59.3%)    | 1642 (50.9%)   | 9567 (65.7%)       |
|                                                                      | >1 Dx | 1003 (23.0%)                | 1427 (31.3%)    | 991 (40.7%)     | 1584 (49.1%)   | 5005 (34.3%)       |
| Inflammation; infection of eye (except that caused by TB)            | None  | 3410 (78.4%)                | 3307 (72.5%)    | 1511 (62.1%)    | 1637 (50.7%)   | 9865 (67.7%)       |
|                                                                      | ≥1 Dx | 942 (21.6%)                 | 1253 (27.5%)    | 923 (37.9%)     | 1589 (49.3%)   | 4707 (32.3%)       |
| Other skin disorders                                                 | None  | 3266 (75.0%)                | 3145 (69.0%)    | 1587 (65.2%)    | 1889 (58.6%)   | 9887 (67.8%)       |
|                                                                      | ≥1 Dx | 1086 (25.0%)                | 1415 (31.0%)    | 847 (34.8%)     | 1337 (41.4%)   | 4685 (32.2%)       |
| Hemolytic jaundice and perinatal jaundice                            | None  | 3081 (70.8%)                | 3225 (70.7%)    | 1691 (69.5%)    | 2280 (70.7%)   | 10277 (70.5%)      |
|                                                                      | ≥1 Dx | 1271 (29.2%)                | 1335 (29.3%)    | 743 (30.5%)     | 946 (29.3%)    | 4295 (29.5%)       |
| Other upper respiratory disease                                      | None  | 3692 (84.8%)                | 3688 (80.9%)    | 1671 (68.7%)    | 1884 (58.4%)   | 10935(75.0%)       |
|                                                                      | ≥1 Dx | 660 (15.2%)                 | 872 (19.1%)     | 763 (31.3%)     | 1342 (41.6%)   | 3637 (25.0%)       |

| Diagnosis (Dx)                                     |       | No. of Antibiotic Exposures |                 |                 |                |                    |
|----------------------------------------------------|-------|-----------------------------|-----------------|-----------------|----------------|--------------------|
|                                                    |       | 0<br>(n=4352)               | 1-2<br>(n=4560) | 3-4<br>(n=2434) | 5+<br>(n=3226) | Total<br>(n=14572) |
| Other and unspecified upper respiratory infections | None  | 3743 (86.0%)                | 3672 (80.5%)    | 1720 (70.7%)    | 1877 (58.2%)   | 11012 (75.6%)      |
|                                                    | ≥1 Dx | 609 (14.0%)                 | 888 (19.5%)     | 714 (29.3%)     | 1349 (41.8%)   | 3560 (24.4%)       |
| Other and unspecified gastrointestinal disorders   | None  | 3606 (82.9%)                | 3592 (78.8%)    | 1785 (73.3%)    | 2086 (64.7%)   | 11069 (76.0%)      |
|                                                    | ≥1 Dx | 746 (17.1%)                 | 968 (21.2%)     | 649 (26.7%)     | 1140 (35.3%)   | 3503 (24.0%)       |
| Other otitis media and related conditions          | None  | 4039 (92.8%)                | 4018 (88.1%)    | 1893 (77.8%)    | 1608 (49.8%)   | 11558 (79.3%)      |
|                                                    | ≥1 Dx | 313 (7.2%)                  | 542 (11.9%)     | 541 (22.2%)     | 1618 (50.2%)   | 3014 (20.7%)       |
| Other male genital disorders                       | None  | 3617 (83.1%)                | 3634 (79.7%)    | 1870 (76.8%)    | 2463 (76.3%)   | 11584 (79.5%)      |
|                                                    | ≥1 Dx | 735 (16.9%)                 | 926 (20.3%)     | 564 (23.2%)     | 763 (23.7%)    | 2988 (20.5%)       |
| Non-infectious gastroenteritis                     | None  | 3759 (86.4%)                | 3690 (80.9%)    | 1842 (75.7%)    | 2298 (71.2%)   | 11589 (79.5%)      |
|                                                    | ≥1 Dx | 593 (13.6%)                 | 870 (19.1%)     | 592 (24.3%)     | 928 (28.8%)    | 2983 (20.5%)       |
| Nausea and vomiting                                | None  | 3737 (85.9%)                | 3752 (82.3%)    | 1864 (76.6%)    | 2288 (70.9%)   | 11641 (79.9%)      |
|                                                    | ≥1 Dx | 615 (14.1%)                 | 808 (17.7%)     | 570 (23.4%)     | 938 (29.1%)    | 2931 (20.1%)       |

**Supplemental Table 5.** Association between Timing of Antibiotic Prescriptions and Risk of Several Common Health Conditions with Childhood Onset.

| Condition                  | Timing (months) | Females<br>HR (95% CI)  | P-value         | Males<br>HR (95% CI)    | P-value         |
|----------------------------|-----------------|-------------------------|-----------------|-------------------------|-----------------|
| <b>Asthma</b>              | 0-6             | <b>1.53 (1.24-1.89)</b> | <b>&lt;.001</b> | 1.06 (0.89-1.27)        | .494            |
|                            | 6-12            | <b>1.27 (1.05-1.54)</b> | <b>.013</b>     | <b>1.21 (1.03-1.41)</b> | <b>.020</b>     |
|                            | 12-24           | <b>1.63 (1.33-2.00)</b> | <b>&lt;.001</b> | <b>1.67 (1.41-1.98)</b> | <b>&lt;.001</b> |
| <b>Allergic rhinitis</b>   | 0-6             | <b>1.59 (1.25-2.01)</b> | <b>&lt;.001</b> | 0.99 (0.81-1.20)        | .887            |
|                            | 6-12            | <b>1.25 (1.01-1.55)</b> | <b>.044</b>     | <b>1.19 (1.00-1.42)</b> | <b>.045</b>     |
|                            | 12-24           | 1.18 (0.95-1.47)        | .141            | <b>1.47 (1.22-1.76)</b> | <b>&lt;.001</b> |
| <b>Food allergy</b>        | 0-6             | 1.59 (0.99-2.56)        | .055            | <b>1.50 (1.05-2.13)</b> | <b>.025</b>     |
|                            | 6-12            | 0.94 (0.61-1.44)        | .784            | 0.96 (0.69-1.34)        | .825            |
|                            | 12-24           | 1.24 (0.81-1.90)        | .324            | 1.27 (0.90-1.79)        | .169            |
| <b>Atopic dermatitis</b>   | 0-6             | <b>1.52 (1.01-2.29)</b> | <b>.046</b>     | <b>1.50 (1.05-2.14)</b> | <b>.024</b>     |
|                            | 6-12            | 1.15 (0.80-1.66)        | .448            | 1.14 (0.82-1.59)        | .437            |
|                            | 12-24           | 1.08 (0.75-1.55)        | .692            | 1.12 (0.80-1.58)        | .496            |
| <b>Celiac disease</b>      | 0-6             | 1.18 (0.45-3.08)        | .730            | 1.19 (0.45-3.16)        | .727            |
|                            | 6-12            | 1.20 (0.52-2.81)        | .667            | 1.20 (0.48-2.99)        | .699            |
|                            | 12-24           | 2.67 (0.97-7.41)        | .059            | 1.90 (0.67-5.45)        | .230            |
| <b>Overweight</b>          | 0-6             | <b>1.25 (1.12-1.38)</b> | <b>&lt;.001</b> | <b>1.18 (1.07-1.30)</b> | <b>.001</b>     |
|                            | 6-12            | <b>1.13 (1.03-1.23)</b> | <b>.007</b>     | <b>1.09 (1.00-1.18)</b> | <b>.042</b>     |
|                            | 12-24           | <b>1.09 (1.00-1.19)</b> | <b>.049</b>     | <b>1.15 (1.05-1.25)</b> | <b>.002</b>     |
| <b>Obesity</b>             | 0-6             | <b>1.17 (1.01-1.36)</b> | <b>.035</b>     | 1.09 (0.96-1.23)        | .202            |
|                            | 6-12            | <b>1.15 (1.01-1.30)</b> | <b>.031</b>     | <b>1.24 (1.11-1.38)</b> | <b>&lt;.001</b> |
|                            | 12-24           | 1.06 (0.94-1.20)        | .332            | 1.09 (0.97-1.22)        | .140            |
| <b>ADHD</b>                | 0-6             | <b>1.46 (1.11-1.91)</b> | <b>.006</b>     | <b>1.19 (1.01-1.41)</b> | <b>.039</b>     |
|                            | 6-12            | 1.03 (0.81-1.32)        | .792            | 1.07 (0.92-1.24)        | .381            |
|                            | 12-24           | 1.29 (1.01-1.66)        | .044            | 1.11 (0.95-1.30)        | .176            |
| <b>Autism</b>              | 0-6             | 2.08 (0.82-5.25)        | .123            | 0.79 (0.49-1.26)        | .316            |
|                            | 6-12            | 0.85 (0.36-2.04)        | .719            | 1.42 (0.96-2.09)        | .078            |
|                            | 12-24           | 0.84 (0.36-1.97)        | .697            | 1.08 (0.73-1.61)        | .694            |
| <b>Learning disability</b> | 0-6             | 1.11 (0.79-1.55)        | .556            | 1.07 (0.87-1.32)        | .516            |
|                            | 6-12            | 1.02 (0.77-1.34)        | .914            | 1.12 (0.94-1.35)        | .209            |
|                            | 12-24           | 1.24 (0.94-1.64)        | .134            | 1.06 (0.88-1.27)        | .559            |

**Supplemental Table 6.** Associations between Child and Maternal Factors and Several Common Health Conditions with Childhood Onset. Data are reported as hazard ratio (95% confidence interval), P-value.

|                                         | <b>Asthma</b>                     | <b>Allergic rhinitis</b>          | <b>Food allergy</b>               | <b>Atopic dermatitis</b>           | <b>Celiac disease</b>         |
|-----------------------------------------|-----------------------------------|-----------------------------------|-----------------------------------|------------------------------------|-------------------------------|
| <b>Male sex</b>                         | <b>1.39 (1.24-1.56), &lt;.001</b> | <b>1.48 (1.30-1.68), &lt;.001</b> | <b>1.56 (1.21-2.00), &lt;.001</b> | 1.15 (0.91-1.44), .242             | 0.81 (0.45-1.46), .489        |
| <b>Birth weight</b>                     | <b>0.84 (0.74-0.95), .004</b>     | 1.05 (0.90-1.22), .528            | 1.18 (0.91-1.54), .212            | 0.94 (0.75-1.19), .619             | <b>2.30 (1.17-4.54), .016</b> |
| <b>Ethnicity</b>                        |                                   |                                   |                                   |                                    |                               |
| Black                                   | <b>1.55 (1.29-1.85), &lt;.001</b> | <b>1.46 (1.19-1.78), &lt;.001</b> | 1.24 (0.82-1.85), .305            | <b>1.67 (1.17-2.37), .004</b>      | 0.66 (0.20-2.13), .489        |
| Asian                                   | 0.96 (0.75-1.23), .765            | 0.82 (0.62-1.09), .166            | 1.47 (0.96-2.25), .077            | <b>1.56 (1.04-2.35), .033</b>      | -                             |
| Hawaiian/Pac. Islander                  | 0.50 (0.12-2.00), .326            | 1.36 (0.57-3.28), .491            | -                                 | -                                  | -                             |
| American Indian                         | <b>2.45 (1.17-5.16), .018</b>     | <b>3.03 (1.44-6.37), .004</b>     | -                                 | <b>5.54 (2.06-14.92), &lt;.001</b> | -                             |
| Other/unknown                           | 1.16 (0.97-1.38), .109            | 0.86 (0.69-1.07), .179            | 0.87 (0.58-1.32), .517            | 1.15 (0.81-1.64), .443             | -                             |
| <b>Cesarean section</b>                 | 1.12 (0.98-1.28), .085            | <b>1.33 (1.16-1.53), &lt;.001</b> | 1.31 (1.00-1.71), .051            | <b>1.57 (1.23-2.00), &lt;.001</b>  | 0.82 (0.39-1.69), .583        |
| <b>Mom age</b>                          | <b>0.85 (0.76-0.94), .002</b>     | <b>1.21 (1.08-1.36), &lt;.001</b> | <b>1.35 (1.08-1.68), .007</b>     | 1.04 (0.85-1.28), .710             | 1.23 (0.73-2.08), .437        |
| <b>Mom education</b>                    |                                   |                                   |                                   |                                    |                               |
| High school or less                     | <b>1.20 (1.04-1.40), .013</b>     | 0.93 (0.78-1.12), .445            | <b>0.52 (0.35-0.78), .002</b>     | 0.79 (0.57-1.10), .159             | 0.94 (0.41-2.11), .872        |
| Some college/4 years                    | <b>0.84 (0.72-0.98), .028</b>     | 1.03 (0.85-1.24), .754            | <b>1.65 (1.08-2.52), .021</b>     | 1.22 (0.86-1.71), .264             | 0.99 (0.42-2.34), .977        |
| Post graduate                           | <b>0.81 (0.68-0.97), .020</b>     | 1.15 (0.94-1.40), .185            | <b>2.41 (1.56-3.72), &lt;.001</b> | 1.36 (0.94-1.96), .102             | 1.21 (0.49-3.01), .677        |
| <b>Mom smoking</b>                      | <b>1.39 (1.18-1.63), &lt;.001</b> | 0.90 (0.73-1.11), .324            | <b>0.29 (0.15-0.56), &lt;.001</b> | <b>0.64 (0.42-0.99), .045</b>      | 0.39 (0.10-1.63), .199        |
| <b>Mom antibiotics during pregnancy</b> | <b>1.29 (1.15-1.44), &lt;.001</b> | <b>1.34 (1.18-1.52), &lt;.001</b> | 1.10 (0.86-1.41), .457            | 0.83 (0.65-1.05), .122             | 0.91 (0.49-1.68), .761        |

|                                         | <b>Overweight</b>                 | <b>Obesity</b>                    | <b>ADHD</b>                       | <b>Autism</b>                      | <b>Learning Disability</b>        |
|-----------------------------------------|-----------------------------------|-----------------------------------|-----------------------------------|------------------------------------|-----------------------------------|
| <b>Male sex</b>                         | <b>1.06 (1.00-1.12), .042</b>     | <b>1.18 (1.09-1.28), &lt;.001</b> | <b>2.56 (2.24-2.92), &lt;.001</b> | <b>4.61 (2.97-7.15), &lt;.001</b>  | <b>2.24 (1.91-2.61), &lt;.001</b> |
| <b>Birth weight</b>                     | <b>1.52 (1.43-1.63), &lt;.001</b> | <b>1.38 (1.26-1.51), &lt;.001</b> | 0.89 (0.78-1.01), .070            | 0.97 (0.68-1.38), .852             | <b>0.81 (0.70-0.93), .004</b>     |
| <b>Ethnicity</b>                        |                                   |                                   |                                   |                                    |                                   |
| Black                                   | <b>1.25 (1.13-1.38), &lt;.001</b> | <b>1.57 (1.38-1.78), &lt;.001</b> | <b>0.76 (0.60-0.97), .029</b>     | 1.10 (0.60-2.00), .764             | 1.08 (0.83-1.39), .566            |
| Asian                                   | <b>0.78 (0.68-0.89), &lt;.001</b> | <b>0.80 (0.66-0.96), .016</b>     | <b>0.19 (0.12-0.32), &lt;.001</b> | 1.16 (0.61-2.22), .653             | 0.99 (0.73-1.34), .959            |
| Hawaiian/Pac. Islander                  | <b>1.80 (1.18-2.73), .006</b>     | <b>2.16 (1.32-3.54), .002</b>     | 0.89 (0.33-2.37), .814            | -                                  | 0.78 (0.20-3.14), .730            |
| American Indian                         | 1.10 (0.65-1.86), .722            | 0.78 (0.33-1.88), .586            | <b>4.06 (2.17-7.57), &lt;.001</b> | <b>8.76 (2.77-27.65), &lt;.001</b> | 1.47 (0.47-4.57), .507            |
| Other/unknown                           | <b>1.36 (1.25-1.47), &lt;.001</b> | <b>1.72 (1.54-1.91), &lt;.001</b> | 0.99 (0.82-1.20), .921            | 1.16 (0.70-1.95), .561             | <b>1.39 (1.14-1.71), .001</b>     |
| <b>Cesarean section</b>                 | <b>1.14 (1.07-1.22), &lt;.001</b> | <b>1.32 (1.21-1.44), &lt;.001</b> | <b>1.21 (1.06-1.39), .005</b>     | 1.29 (0.89-1.85), .179             | 1.15 (0.98-1.35), .094            |
| <b>Mom age</b>                          | <b>0.88 (0.83-0.92), &lt;.001</b> | <b>0.83 (0.77-0.89), &lt;.001</b> | <b>0.61 (0.55-0.68), &lt;.001</b> | <b>1.58 (1.18-2.12), .002</b>      | 1.01 (0.88-1.15), .924            |
| <b>Mom education</b>                    |                                   |                                   |                                   |                                    |                                   |
| High school or less                     | <b>1.39 (1.30-1.50), &lt;.001</b> | <b>1.80 (1.63-1.97), &lt;.001</b> | <b>1.34 (1.16-1.56), &lt;.001</b> | 0.89 (0.56-1.42), .620             | <b>1.46 (1.23-1.74), &lt;.001</b> |
| Some college/4 years                    | <b>0.77 (0.71-0.83), &lt;.001</b> | <b>0.63 (0.57-0.69), &lt;.001</b> | <b>0.83 (0.71-0.97), .019</b>     | 1.28 (0.79-2.07), .317             | <b>0.70 (0.58-0.84), &lt;.001</b> |
| Post graduate                           | <b>0.63 (0.58-0.69), &lt;.001</b> | <b>0.44 (0.39-0.50), &lt;.001</b> | <b>0.60 (0.49-0.72), &lt;.001</b> | 0.85 (0.49-1.50), .580             | <b>0.66 (0.53-0.81), &lt;.001</b> |
| <b>Mom smoking</b>                      | <b>1.32 (1.21-1.43), &lt;.001</b> | <b>1.45 (1.30-1.62), &lt;.001</b> | <b>2.33 (2.01-2.70), &lt;.001</b> | 1.22 (0.74-1.99), .438             | <b>1.38 (1.12-1.69), .002</b>     |
| <b>Mom antibiotics during pregnancy</b> | <b>1.21 (1.14-1.28), &lt;.001</b> | <b>1.26 (1.16-1.36), &lt;.001</b> | <b>1.53 (1.36-1.72), &lt;.001</b> | 1.10 (0.78-1.53), .592             | <b>1.20 (1.04-1.39), .013</b>     |

**Supplemental Table 7.** Associations between Antibiotic Prescriptions in The First Two Years of Life and Risk of Common Health Conditions with Childhood Onset, after Adjustment for Child Confounders (birth weight, ethnicity, and cesarean section) and Maternal Confounders (age, education, smoking, and antibiotic use during pregnancy), in Females and Males, Separately.

| Condition                  | Females                  |                 | Males                   |                 |
|----------------------------|--------------------------|-----------------|-------------------------|-----------------|
|                            | HR (95% CI)              | P-value         | HR (95% CI)             | P-value         |
| <b>Asthma</b>              | <b>2.06 (1.63-2.60)</b>  | <b>&lt;.001</b> | <b>1.79 (1.47-2.17)</b> | <b>&lt;.001</b> |
| <b>Allergic rhinitis</b>   | <b>1.34 (1.05-1.69)</b>  | <b>.017</b>     | <b>1.38 (1.13-1.68)</b> | <b>.002</b>     |
| <b>Food allergy</b>        | 1.26 (0.80-1.99)         | .313            | 1.37 (0.94-2.00)        | .098            |
| <b>Atopic dermatitis</b>   | <b>1.52 (1.01-2.27)</b>  | <b>.042</b>     | 1.43 (0.98-2.08)        | .060            |
| <b>Celiac disease</b>      | <b>9.04 (1.22-67.04)</b> | <b>.031</b>     | 1.39 (0.47-4.14)        | .556            |
| <b>Overweight</b>          | <b>1.20 (1.09-1.32)</b>  | <b>&lt;.001</b> | <b>1.23 (1.12-1.35)</b> | <b>&lt;.001</b> |
| <b>Obesity</b>             | <b>1.15 (1.01-1.31)</b>  | <b>.033</b>     | <b>1.25 (1.10-1.41)</b> | <b>&lt;.001</b> |
| <b>ADHD</b>                | <b>1.53 (1.16-2.02)</b>  | <b>.003</b>     | <b>1.25 (1.06-1.48)</b> | <b>.008</b>     |
| <b>Autism</b>              | 0.85 (0.36-1.98)         | .700            | 1.29 (0.83-2.00)        | .256            |
| <b>Learning disability</b> | 1.22 (0.91-1.64)         | .182            | 1.21 (0.99-1.48)        | .062            |

**Supplemental Table 8.** The Number (No.) and Percentage (%) of Children with the Most Common Disease Dyads and Triads Stratified by Exposure to Antibiotics in the First 24 Months of Life.

| <b>Dyad Combinations</b>                            | <b>Not exposed<br/>No. (%)</b> | <b>Exposed<br/>No. (%)</b> |
|-----------------------------------------------------|--------------------------------|----------------------------|
| Obesity - asthma                                    | 59 (14.0)                      | 269 (16.9)                 |
| Obesity - ADHD                                      | 70 (16.6)                      | 157 (9.8)                  |
| Asthma - allergic rhinitis                          | 33 (7.8)                       | 148 (9.3)                  |
| Obesity - learning disability                       | 42 (10.0)                      | 141 (8.8)                  |
| Obesity - allergic rhinitis                         | 35 (8.3)                       | 125 (7.8)                  |
| Learning disability - ADHD                          | 19 (4.5)                       | 97 (6.1)                   |
| Obesity - atopic dermatitis                         | 24 (5.7)                       | 91 (5.7)                   |
| Asthma - atopic dermatitis                          | 15 (3.6)                       | 73 (4.6)                   |
| Food allergy - atopic dermatitis                    | 15 (3.6)                       | 66 (4.1)                   |
| Asthma - ADHD                                       | 8 (1.9)                        | 64 (4.0)                   |
| Asthma - food allergy                               | 10 (2.4)                       | 52 (3.3)                   |
| Asthma - learning disability                        | 7 (1.7)                        | 49 (3.1)                   |
| Learning disability - autism                        | 15 (3.6)                       | 32 (2.0)                   |
| Obesity – food allergy                              | 20 (4.7)                       | 19 (1.2)                   |
|                                                     |                                |                            |
| <b>Triad combinations</b>                           | <b>Not exposed<br/>No. (%)</b> | <b>Exposed<br/>No. (%)</b> |
| Obesity - asthma - allergic rhinitis                | 16 (14.2)                      | 68 (13.1)                  |
| Obesity - asthma - ADHD                             | 5 (4.4)                        | 39 (7.5)                   |
| Obesity - ADHD - learning disability                | 9 (8.0)                        | 35 (6.8)                   |
| Obesity – asthma – atopic dermatitis                | 1 (0.9)                        | 32 (6.2)                   |
| Asthma - food allergy - allergic rhinitis           | 7 (6.2)                        | 29 (5.6)                   |
| Asthma - food allergy - atopic dermatitis           | 4 (3.5)                        | 24 (4.6)                   |
| Asthma - obesity - learning disability              | 4 (3.5)                        | 21 (4.1)                   |
| Asthma - allergic rhinitis - ADHD                   | 3 (2.7)                        | 21 (4.1)                   |
| Obesity - allergic rhinitis - ADHD                  | 4 (3.5)                        | 18 (3.5)                   |
| Asthma - allergic rhinitis - atopic dermatitis      | 6 (5.3)                        | 17 (3.3)                   |
| Obesity – learning disability – autism              | 4 (3.5)                        | 17 (3.3)                   |
| Food allergy - atopic dermatitis– allergic rhinitis | 3 (2.7)                        | 17 (3.3)                   |
| Obesity – atopic dermatitis – allergic rhinitis     | 5 (4.4)                        | 8 (1.5)                    |

Data expressed as No. (%) of children with at least 2 conditions for dyads (not exposed, n=422; exposed, n=1,595) and of children with at least 3 conditions for triads (not exposed, n=113; exposed, n=518).
